# Supplementary material
Source: PubMed Central journal article supplement (PMC11115892)
Supplement: 18_2009_58_MOESM1_ESM.pdf [file 18_2009_58_MOESM1_ESM.pdf]

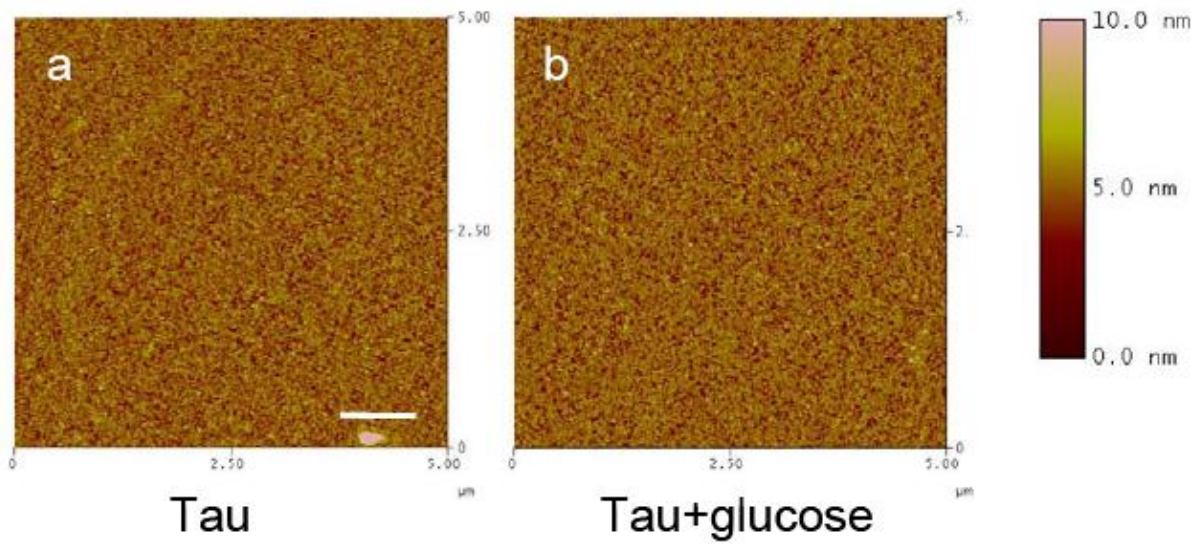

Supplementary Figure 1. Aliquots of Tau protein incubated with *D*-glucose (7 days) were observed by atomic force microscopy (panels a,b). Sizes (nm) of the particles of Tau protein incubated with *D*-glucose (panel a), and Tau alone (panel b) were similar. The scale bar equals 1000 nm.
