# Supplementary material
Source: PubMed Central journal article supplement (PMC11115892)
Supplement: 18_2009_58_MOESM2_ESM.pdf [file 18_2009_58_MOESM2_ESM.pdf]

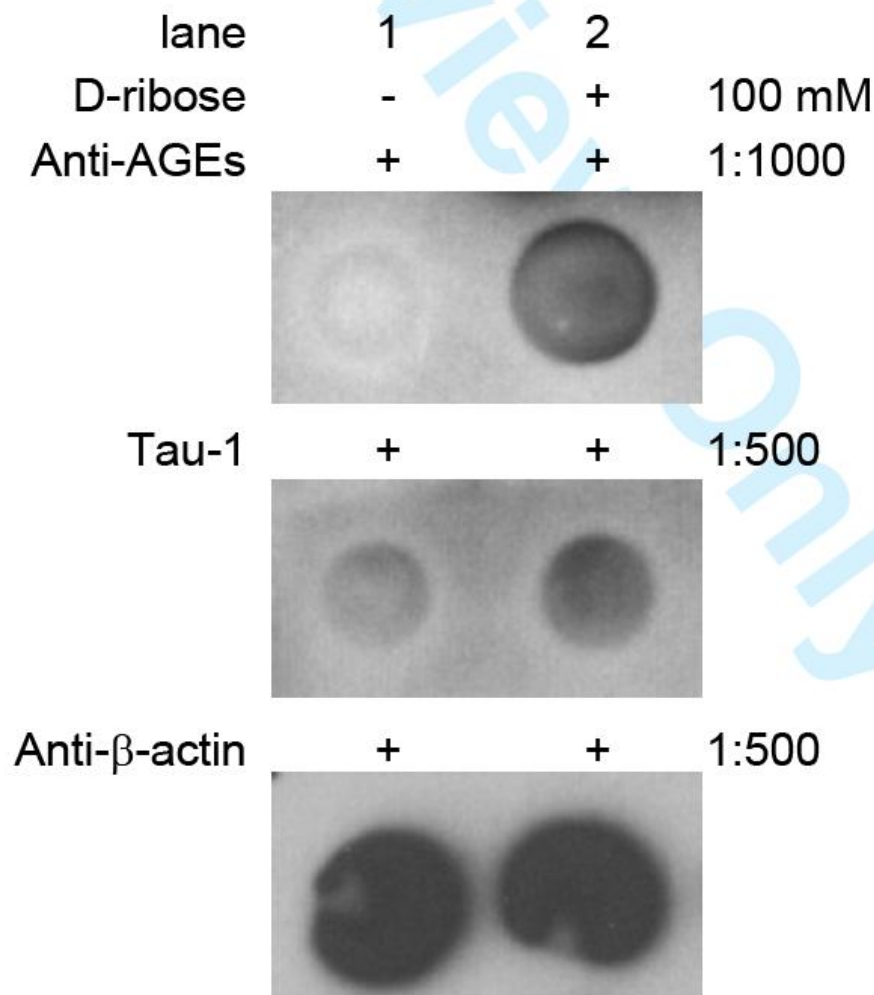

Supplementary Figure 2. *D*-ribose (100 mM) was added to medium for SHSY5Y cells and cultured for 72 hours. Then, cells were lysed. To detect the intracellular glycated protein, Dot blotting was carried out by using anti-AGEs monoclonal antibody, Tau1 monoclonal antibody and anti-β-actin polyclonal antibody.
